# Supplementary material
Source: Springer Nature journal article supplement (https://www.springermedizin.de/resource/supplementary/12936_2012_2780_MOESM10_ESM.pdf/9544528)

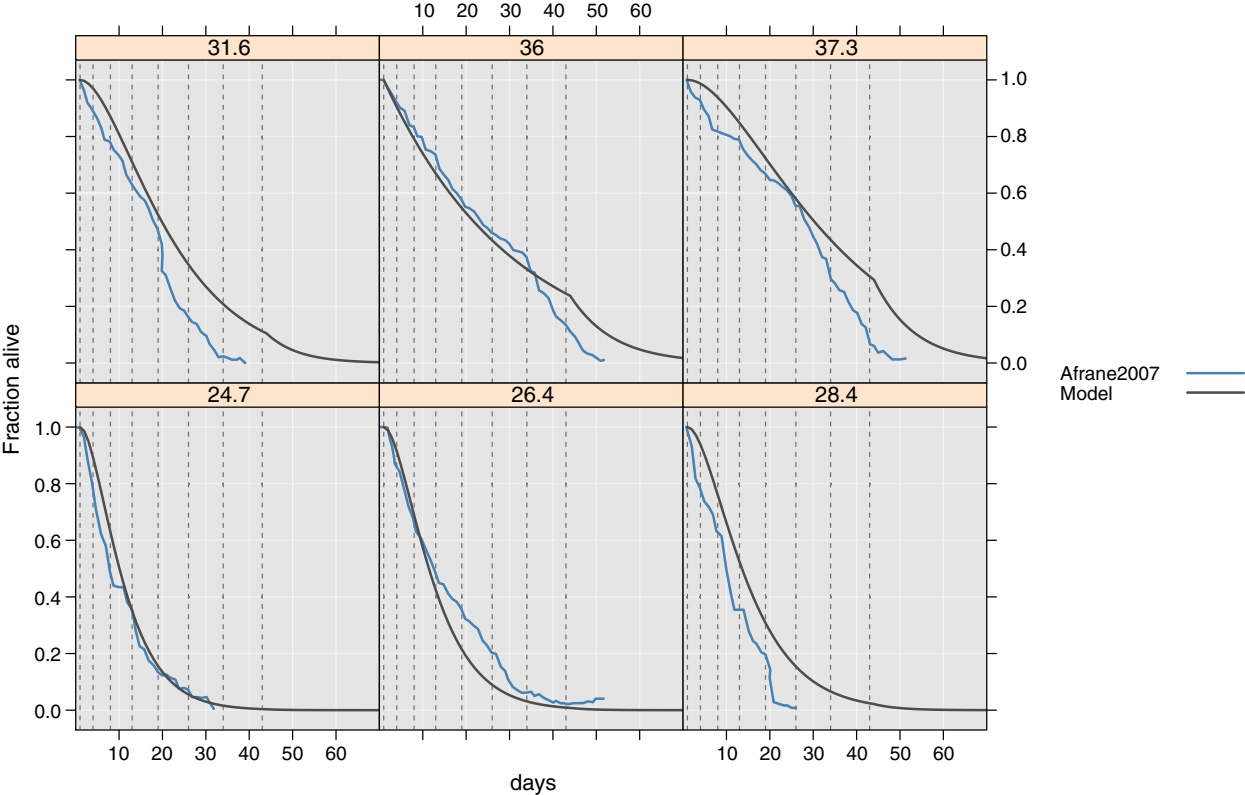

Supplement: MOESM10 [file 9544528]
